# Supplementary material
Source: publisher figshare collection journal article supplement (https://acs.figshare.com/ndownloader/files/22644413)
Supplement: Supplementary file 1 [file 22644413]

## Supporting Information

### A Novel Application of Dopants in Ion Mobility Spectrometry: Suppression of Fragment Ions of Citric Acid

Younes Valadbeigi<sup>†\*</sup>, Sahar Bayat<sup>†</sup>, Vahideh Ilbeigi<sup>‡</sup>,

<sup>†</sup>Department of Chemistry, Faculty of Science, Imam Khomeini International University, Qazvin, Iran.

<sup>‡</sup>TOF Tech. Pars Company, Isfahan Science & Technology Town, Isfahan, Iran.

(Y.V.) E-mail: valadbeigi@sci.ikiu.ac.ir. Tel: +98 28 3390 1367.

| Content                                                                                                                                                                                               | page |
|-------------------------------------------------------------------------------------------------------------------------------------------------------------------------------------------------------|------|
| <b>Figure S1.</b> Schematic representation of different parts of the IMS                                                                                                                              | S2   |
| <b>Figure S2.</b> IMS spectra of citric acid at different temperatures of injection port                                                                                                              | S3   |
| <b>Figure S3.</b> IMS spectra of citric acid at different temperatures of the drift tube                                                                                                              | S4   |
| <b>Figure S4.</b> IMS spectra of citric acid in the presence of NH <sub>3</sub> dopant                                                                                                                | S5   |
| <b>Figure S5.</b> Structures of the citric acid fragments and their protonated forms                                                                                                                  | S6   |
| <b>Figure S6.</b> The optimized structures of NH <sub>4</sub> <sup>+</sup> (H <sub>2</sub> O) <sub>n</sub> clusters                                                                                   | S7   |
| <b>Table S1.</b> Calculated $\Delta H$ and $\Delta G$ values for hydration of NH <sub>4</sub> <sup>+</sup>                                                                                            | S7   |
| <b>Figure S7.</b> Optimized structures of mono-, di-, and tri-hydrated form of CA.H <sup>+</sup>                                                                                                      | S8   |
| <b>Table S2.</b> Calculated $\Delta H$ and $\Delta G$ values for hydration of CA.H <sup>+</sup>                                                                                                       | S9   |
| <b>Figure S8.</b> Relative abundances for hydrated forms of NH <sub>4</sub> <sup>+</sup> , CA.H <sup>+</sup> , and (CA-H) <sup>+</sup>                                                                | S10  |
| <b>Figure S9.</b> Structures of deprotonated forms of aconitic acid in gas phase                                                                                                                      | S11  |
| <b>Table S3.</b> $\Delta H$ and $\Delta G$ values for protonation of the anionic reactant ions                                                                                                        | S11  |
| <b>Figure S10.</b> The optimized structures of hydrated forms of (CA-H) <sup>-</sup> in gas phase                                                                                                     | S12  |
| <b>Table S4.</b> The calculated $\Delta H$ and $\Delta G$ values for hydration of (CA-H) <sup>-</sup>                                                                                                 | S13  |
| <b>Figure S11.</b> The optimized structures of hydrated forms of Cl <sup>-</sup> , Br <sup>-</sup> , and I <sup>-</sup>                                                                               | S13  |
| <b>Table S5.</b> The calculated $\Delta H$ and $\Delta G$ values for hydration of Cl <sup>-</sup> , Br <sup>-</sup> , and I <sup>-</sup>                                                              | S14  |
| <b>Figure S12.</b> Relative abundances of (H <sub>2</sub> O) <sub>n</sub> Cl <sup>-</sup> , (H <sub>2</sub> O) <sub>n</sub> Br <sup>-</sup> , and (H <sub>2</sub> O) <sub>n</sub> I <sup>-</sup> ions | S14  |
| <b>Figure S13.</b> Optimized structures for different isomers of CA.Cl <sup>-</sup> , CA.Br <sup>-</sup> , and CA.I <sup>-</sup>                                                                      | S15  |
| <b>Table S6.</b> Calculated $\Delta H$ and $\Delta G$ values for formation of CA.Cl <sup>-</sup> , CA.Br <sup>-</sup> , and CA.I <sup>-</sup>                                                         | S15  |
| <b>Figure S14.</b> IMS spectra of citric acid with and without halomethane dopants                                                                                                                    | S16  |
| <b>Figure S15.</b> Calibration curves for citric acid                                                                                                                                                 | S17  |
| <b>Figure S16.</b> Manual preparation of fresh lemon juice                                                                                                                                            | S18  |

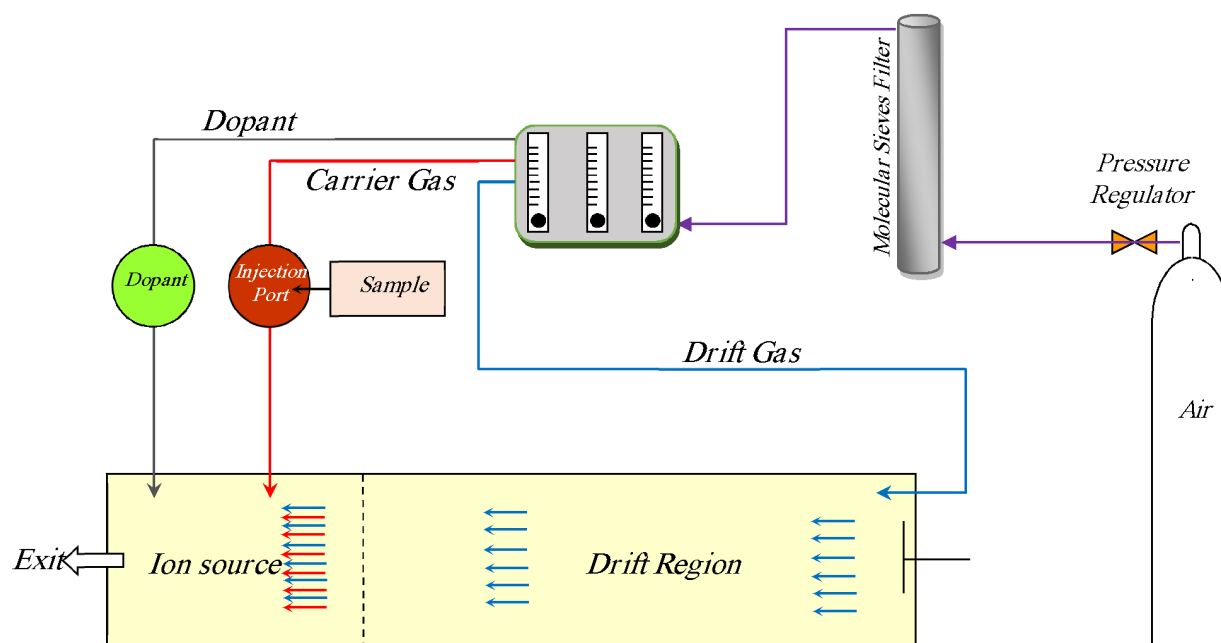

**Figure S1.** Schematic representation of different parts of the IMS used in this work and the paths of carrier, drift, and dopant gases.

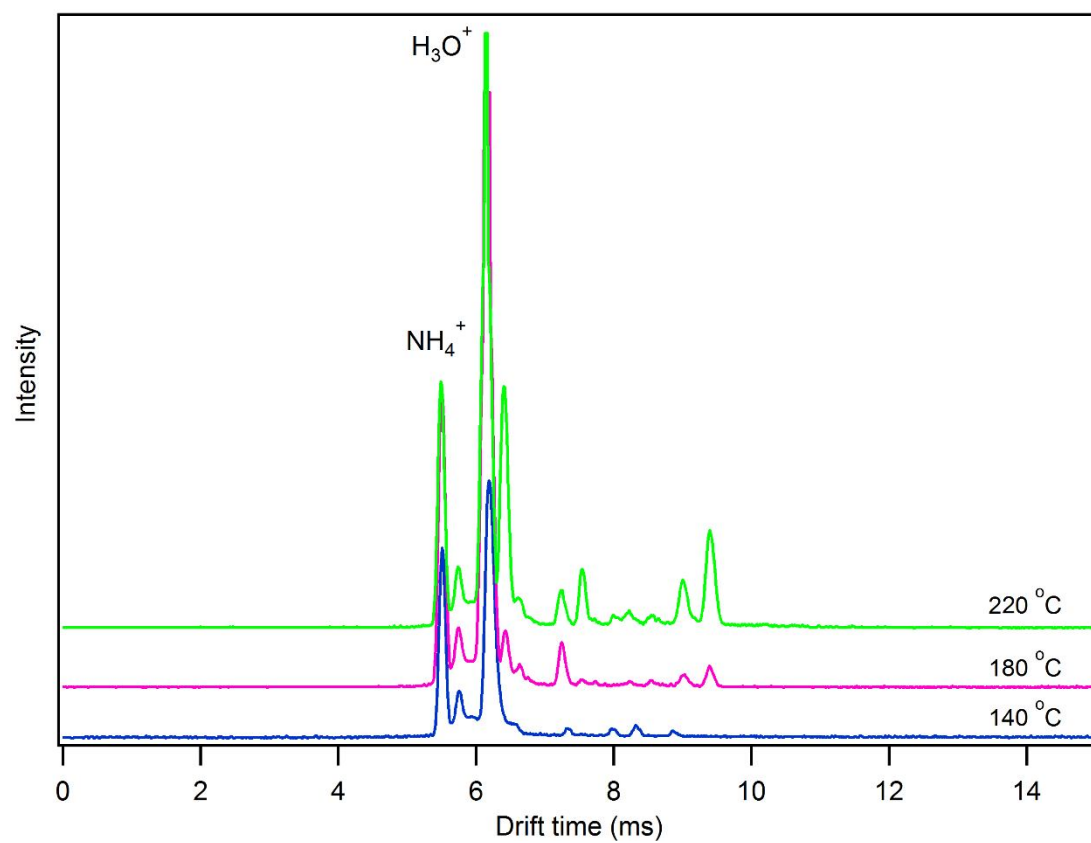

**Figure S2.** IMS spectra of citric acid (100 ppm) at different temperatures of the injection port with  $\text{H}_3\text{O}^+$  as the main reactant ion RI. The drift tube temperature was 140 °C.

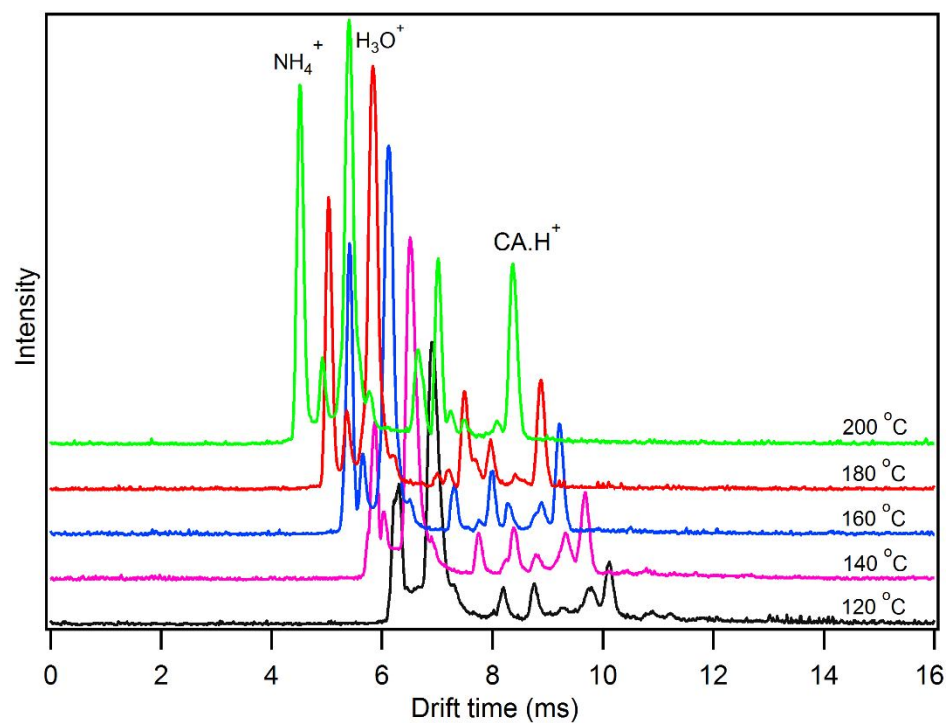

**Figure S3.** IMS spectra of citric acid at different temperatures of the drift tube in the absence of  $\text{NH}_3$  dopant, i.e. the main reactant ion is  $\text{H}_3\text{O}^+$ . The injection port temperature was 220 °C.

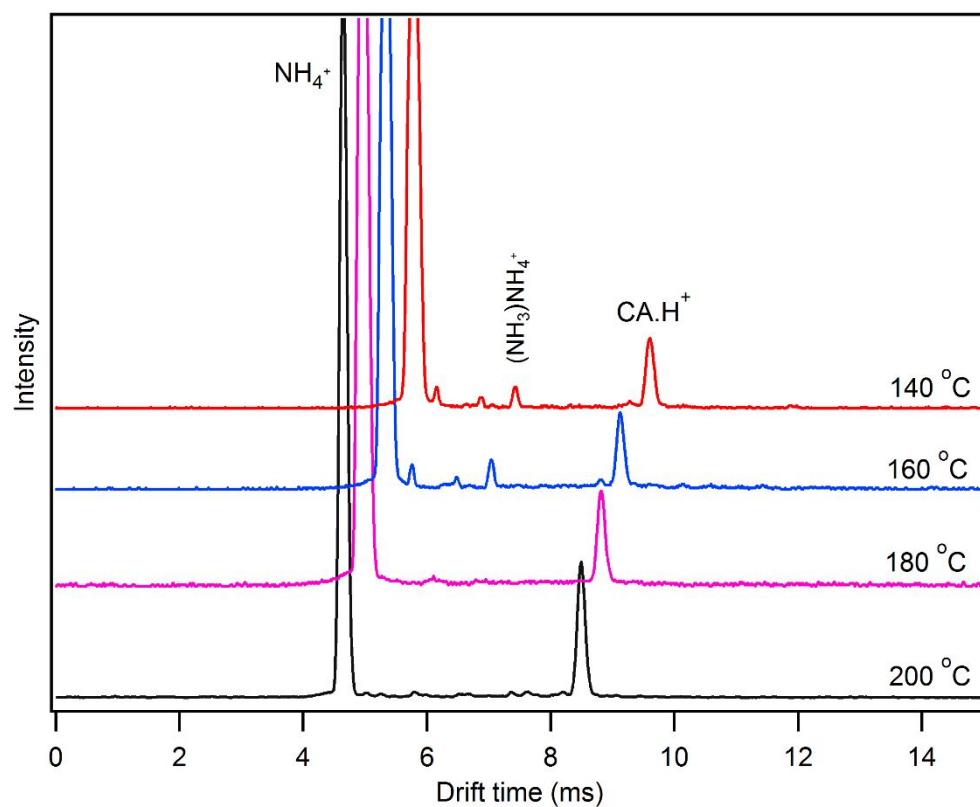

**Figure S4.** IMS spectra of citric acid (100 ppm) at different temperatures of the drift tube in the presence of  $\text{NH}_3$  dopant. In this condition, the reactant ion is  $\text{NH}_4^+$ . The injection port temperature was 220 °C.

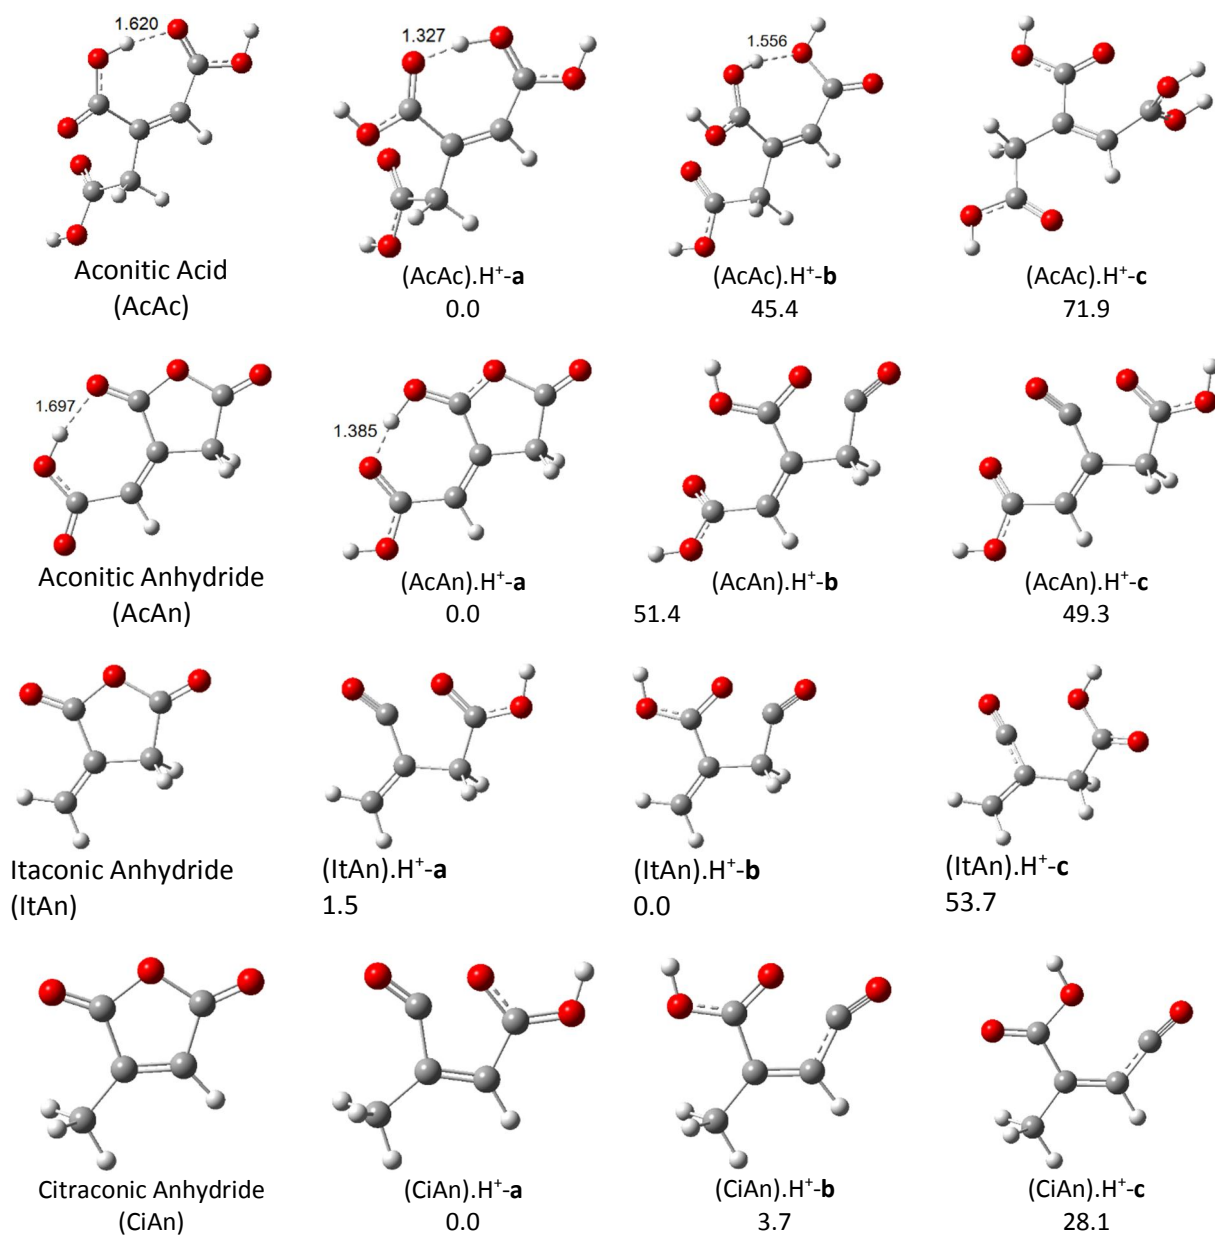

**Figure S5.** The optimized structures of the fragments of citric acid and their protonated forms. The relative energies and bond lengths are in  $\text{kJ mol}^{-1}$  and Å, respectively.

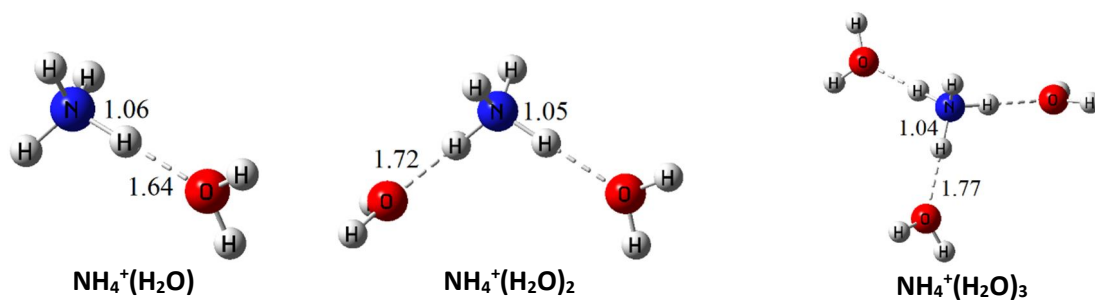

**Figure S6.** The optimized structures of  $\text{NH}_4^+(\text{H}_2\text{O})_n$  clusters. The bond lengths are in Å.

**Table S1.** The calculated values of  $\Delta H$ ,  $\Delta G$  and equilibrium constant ( $K$ ) for formation of  $\text{NH}_4^+(\text{H}_2\text{O})_n$  clusters in gas phase and at 298 K.

| Hydration                                                                                                  | $\Delta H$ (kJ mol <sup>-1</sup> ) | $\Delta G$ (kJ mol <sup>-1</sup> ) | $K$ (1/atm)       |
|------------------------------------------------------------------------------------------------------------|------------------------------------|------------------------------------|-------------------|
| $\text{NH}_4^+ + \text{H}_2\text{O} \rightarrow \text{NH}_4^+(\text{H}_2\text{O})$                         | -89.5                              | -50.1                              | $5.9 \times 10^8$ |
| $\text{NH}_4^+(\text{H}_2\text{O}) + \text{H}_2\text{O} \rightarrow \text{NH}_4^+(\text{H}_2\text{O})_2$   | -66.9                              | -43.3                              | $3.8 \times 10^7$ |
| $\text{NH}_4^+(\text{H}_2\text{O})_2 + \text{H}_2\text{O} \rightarrow \text{NH}_4^+(\text{H}_2\text{O})_3$ | -57.6                              | -23.3                              | $1.2 \times 10^4$ |

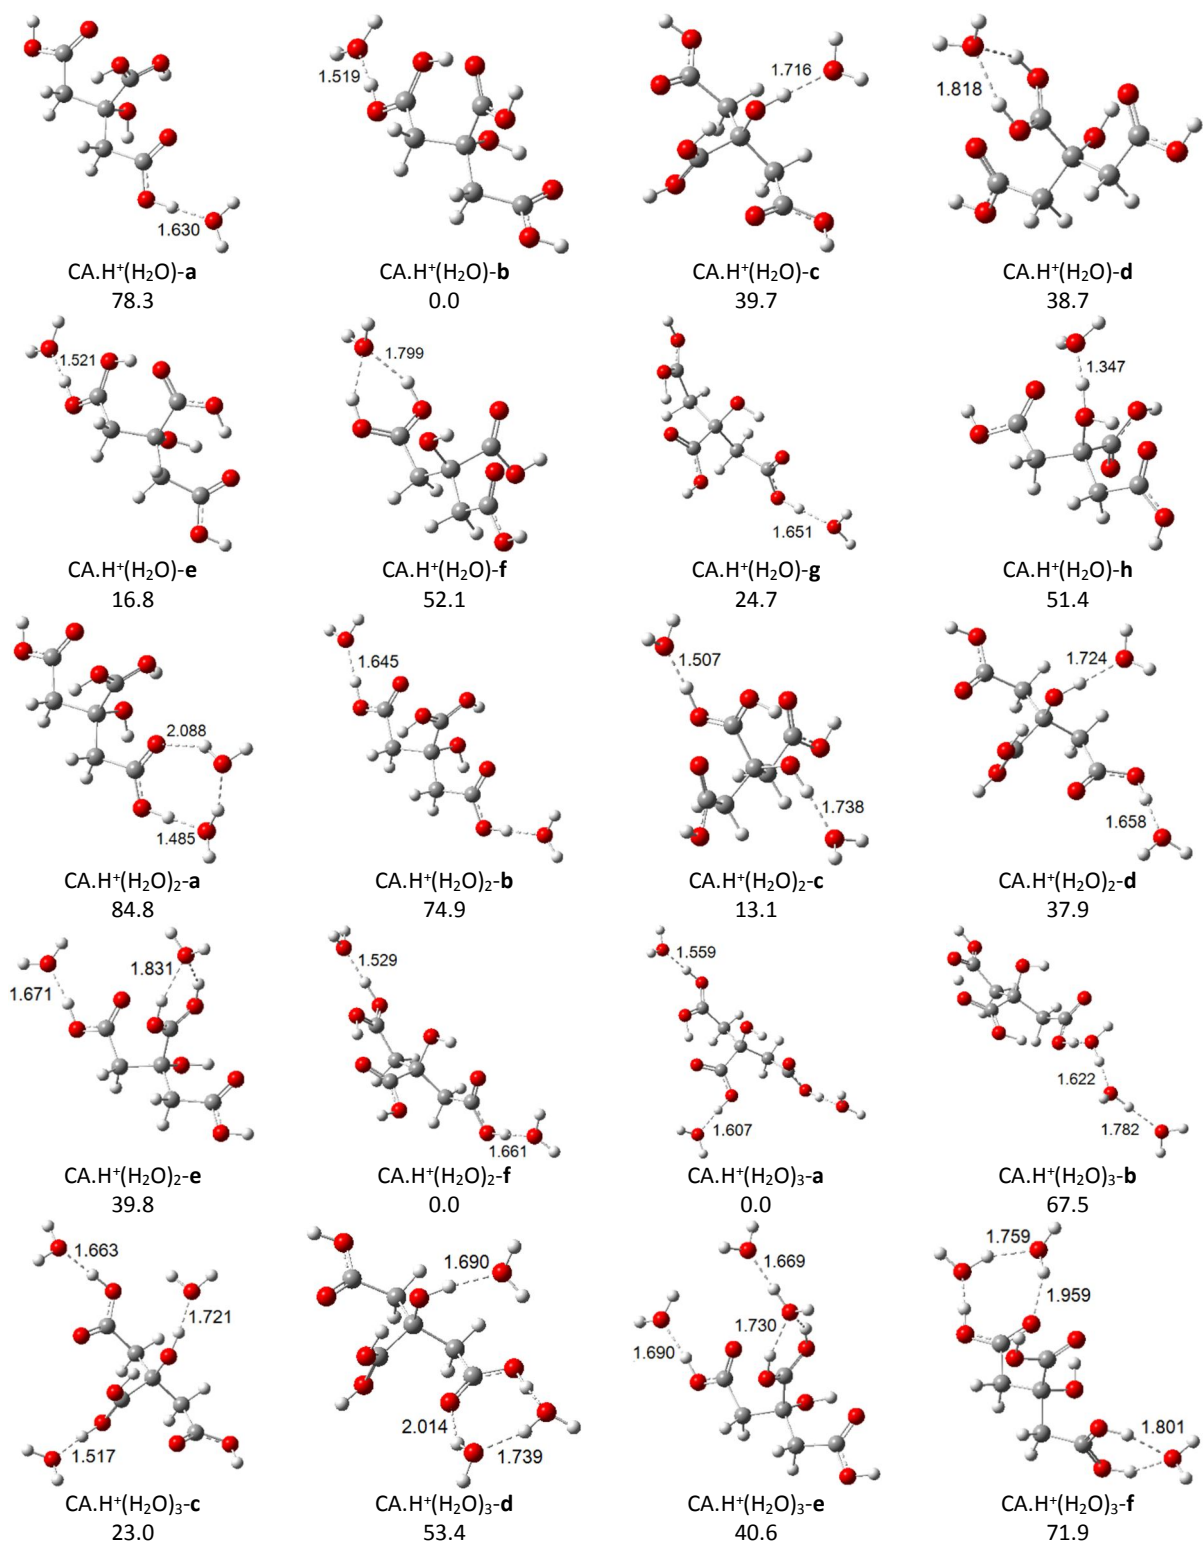

**Figure S7.** The optimized structures of mono-, di-, and tri-hydrated form of CA.H<sup>+</sup> in gas phase. The relative energies and bond lengths are in kJ mol<sup>-1</sup> and Å, respectively.



**Table S2.** The calculated values of  $\Delta H$ ,  $\Delta G$  and equilibrium constant (K) for hydration of  $CA.H^+$  in gas phase and at 298 K.

| Hydration                                          | $\Delta H$ (kJ mol <sup>-1</sup> ) | $\Delta G$ (kJ mol <sup>-1</sup> ) | K (1/atm)         |
|----------------------------------------------------|------------------------------------|------------------------------------|-------------------|
| $CA.H^+ + H_2O \rightarrow CA.H^+(H_2O)$           | -75.9                              | -42.9                              | $3.3 \times 10^7$ |
| $CA.H^+(H_2O) + H_2O \rightarrow CA.H^+(H_2O)_2$   | -64.8                              | -31.8                              | $3.7 \times 10^5$ |
| $CA.H^+(H_2O)_2 + H_2O \rightarrow CA.H^+(H_2O)_3$ | -61.3                              | -27.4                              | $6.3 \times 10^4$ |

## S-1 hydration model

Relative abundances,  $Y_i$ , of  $MH^+(H_2O)_i$  can be calculated from equilibrium constants for following consecutive reactions

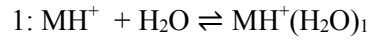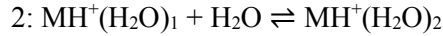

.....

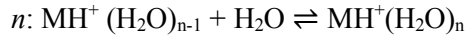

The equilibrium constant of each hydration reaction can be written as following

$$K_i = \frac{[MH^+(H_2O)_i]}{[MH^+(H_2O)_{i-1}]w} \quad (1)$$

Where  $w$  is water concentration. The equilibrium constant,  $K_i$ , can be computed from  $\Delta G^\circ$  of each hydration reaction

$$K_i = \exp(-\Delta G_i^\circ / RT) \quad (2)$$

where  $R$  is the gas constant and  $T$  is the absolute temperature.

Concentration of each ion can be obtained using equation (1)

$$MH^+(H_2O)_1 = [MH^+].w.K_1$$

$$MH^+(H_2O)_2 = [MH^+].w^2.K_1K_2$$

$$MH^+(H_2O)_j = [MH^+].w^j \prod_{i=1}^j K_i \quad (3)$$

The relative abundance for  $MH^+(H_2O)_j$  is

$$Y_j = \frac{[\text{MH}^+(\text{H}_2\text{O})_j]}{\sum_{i=0}^{n_{\max}} [\text{MH}^+(\text{H}_2\text{O})_i]} \quad (4)$$

Where  $n_{\max}$  is the maximum number of water molecules in a  $\text{MH}^+(\text{H}_2\text{O})_n$ .  $n_{\max}$  was taken equal to 3 or 4.

Combination of equations (3) and (4) results in

$$Y_j = \frac{w^j \prod_{i=0}^j K_i}{\sum_{n=0}^{n_{\max}} w^n \prod_{i=0}^n K_i} \quad (5)$$

where  $K_0=1$ .

The van't Hoff equation was used to obtain the equilibrium constant,  $K_i$ , at the temperatures other than 25 °C (298 K):

$$\frac{d \ln K_i}{d(1/T)} = -\frac{\Delta H_i^\circ}{R} \quad (6)$$

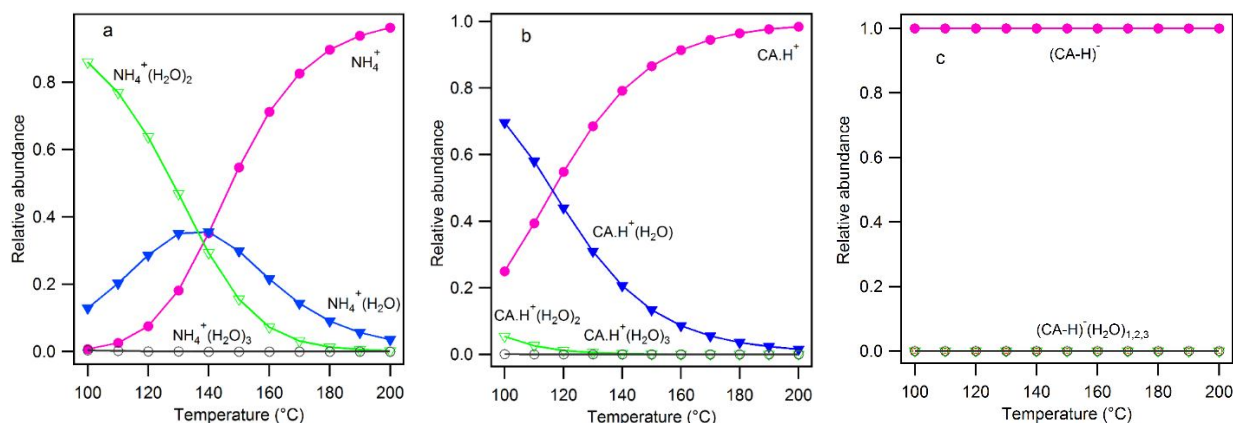

**Figure S8.** The calculated relative abundances for (a)  $\text{NH}_4^+(\text{H}_2\text{O})_n$ , (b)  $\text{CA.H}^+(\text{H}_2\text{O})_n$ , and (c)  $(\text{CA-H})^-(\text{H}_2\text{O})_n$  in gas phase in the presence of 40 ppm water vapor.

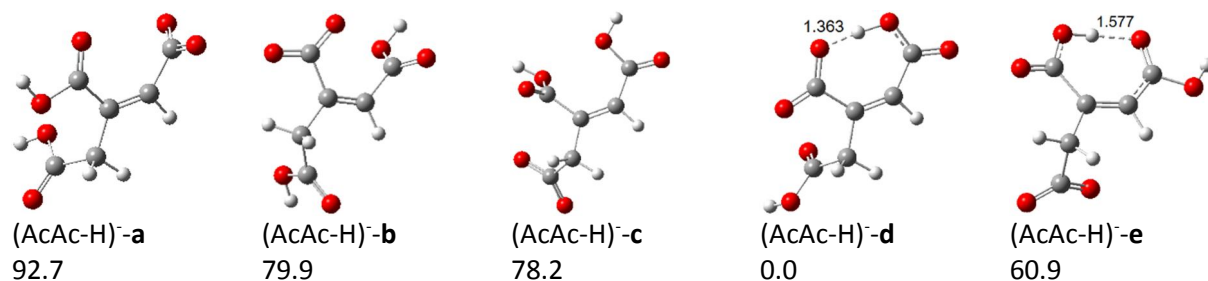

**Figure S9.** The optimized structures for different isomers of deprotonated form (conjugated bases) of aconitic acid in gas phase. The relative energies and bond lengths are in  $\text{kJ mol}^{-1}$  and Å, respectively.

**Table S3.** The calculated  $\Delta H$  and  $\Delta G$  values for protonation of the negative reactant ions ( $\text{O}_2^-$ ,  $\text{Cl}^-$ ,  $\text{Br}^-$ ,  $\text{I}^-$ ) and deprotonation of CA and its fragments in gas phase and at 298 K. The fragments with smaller deprotonation enthalpies are more acidic and deprotonated easier.

| Protonation/deprotonation                                                 | $\Delta H$ ( $\text{kJ mol}^{-1}$ ) | $\Delta G$ ( $\text{kJ mol}^{-1}$ ) |
|---------------------------------------------------------------------------|-------------------------------------|-------------------------------------|
| $\text{O}_2^- + \text{H}^+ \rightarrow \text{HO}_2$                       | -1461.9                             | -1437.0                             |
| $\text{Cl}^- + \text{H}^+ \rightarrow \text{HCl}$                         | -1378.4                             | -1356.0                             |
| $\text{Br}^- + \text{H}^+ \rightarrow \text{HBr}$                         | -1341.2                             | -1319.2                             |
| $\text{I}^- + \text{H}^+ \rightarrow \text{HI}$                           | -1315.2                             | -1294.0                             |
| $\text{CA} \rightarrow (\text{CA-H})^- + \text{H}^+$                      | 1278.8                              | 1256.4                              |
| $\text{AcAn} \rightarrow (\text{AcAn-H})^- + \text{H}^+$                  | 1355.3                              | 1320.1                              |
| $\text{AcAc} \rightarrow (\text{AcAc-H})^- + \text{H}^+$                  | 1303.8                              | 1275.2                              |
| $\text{CH}_3\text{COOH} \rightarrow \text{CH}_3\text{COO}^- + \text{H}^+$ | 1446.1                              | 1413.1                              |
| $\text{HCOOH} \rightarrow \text{HCOO}^- + \text{H}^+$                     | 1426.4                              | 1395.2                              |

CA: Citric acid; AcAn: Aconitic anhydride; AcAc: Aconitic acid

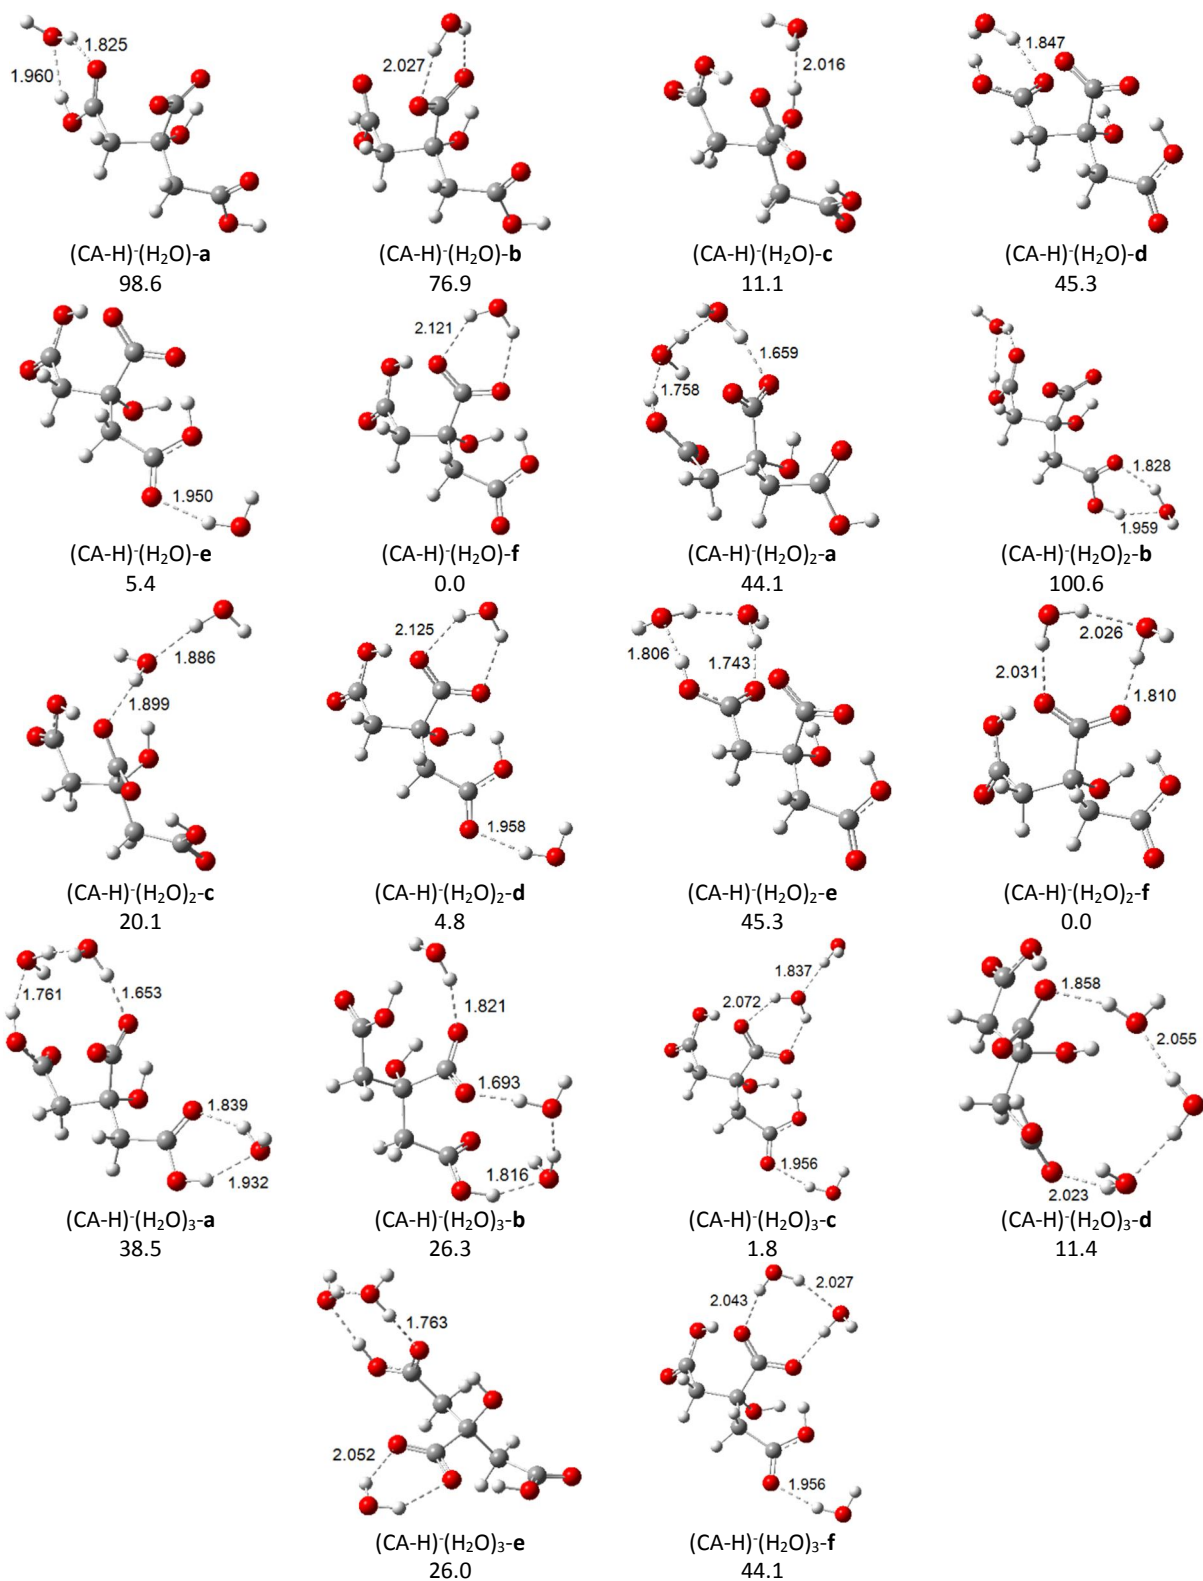

**Figure S10.** The optimized structures of mono-, di-, and tri-hydrated forms of (CA-H)<sup>-</sup> in gas phase. The relative energies and bond lengths are in kJ mol<sup>-1</sup> and Å, respectively.

**Table S4.** The calculated values of  $\Delta H$ ,  $\Delta G$  and equilibrium constant ( $K$ ) for hydration of  $(\text{CA-H})^-$  in gas phase and at 298 K.

| Hydration                                                                                                      | $\Delta H$ (kJ mol <sup>-1</sup> ) | $\Delta G$ (kJ mol <sup>-1</sup> ) | $K$ (1/atm)          |
|----------------------------------------------------------------------------------------------------------------|------------------------------------|------------------------------------|----------------------|
| $(\text{CA-H})^- + \text{H}_2\text{O} \rightarrow (\text{CA-H})^-(\text{H}_2\text{O})$                         | -40.4                              | -6.6                               | $1.4 \times 10^1$    |
| $(\text{CA-H})^-(\text{H}_2\text{O}) + \text{H}_2\text{O} \rightarrow (\text{CA-H})^-(\text{H}_2\text{O})_2$   | -36.7                              | 1.2                                | $6.1 \times 10^{-1}$ |
| $(\text{CA-H})^-(\text{H}_2\text{O})_2 + \text{H}_2\text{O} \rightarrow (\text{CA-H})^-(\text{H}_2\text{O})_3$ | -32.3                              | -0.4                               | $1.2 \times 10^0$    |

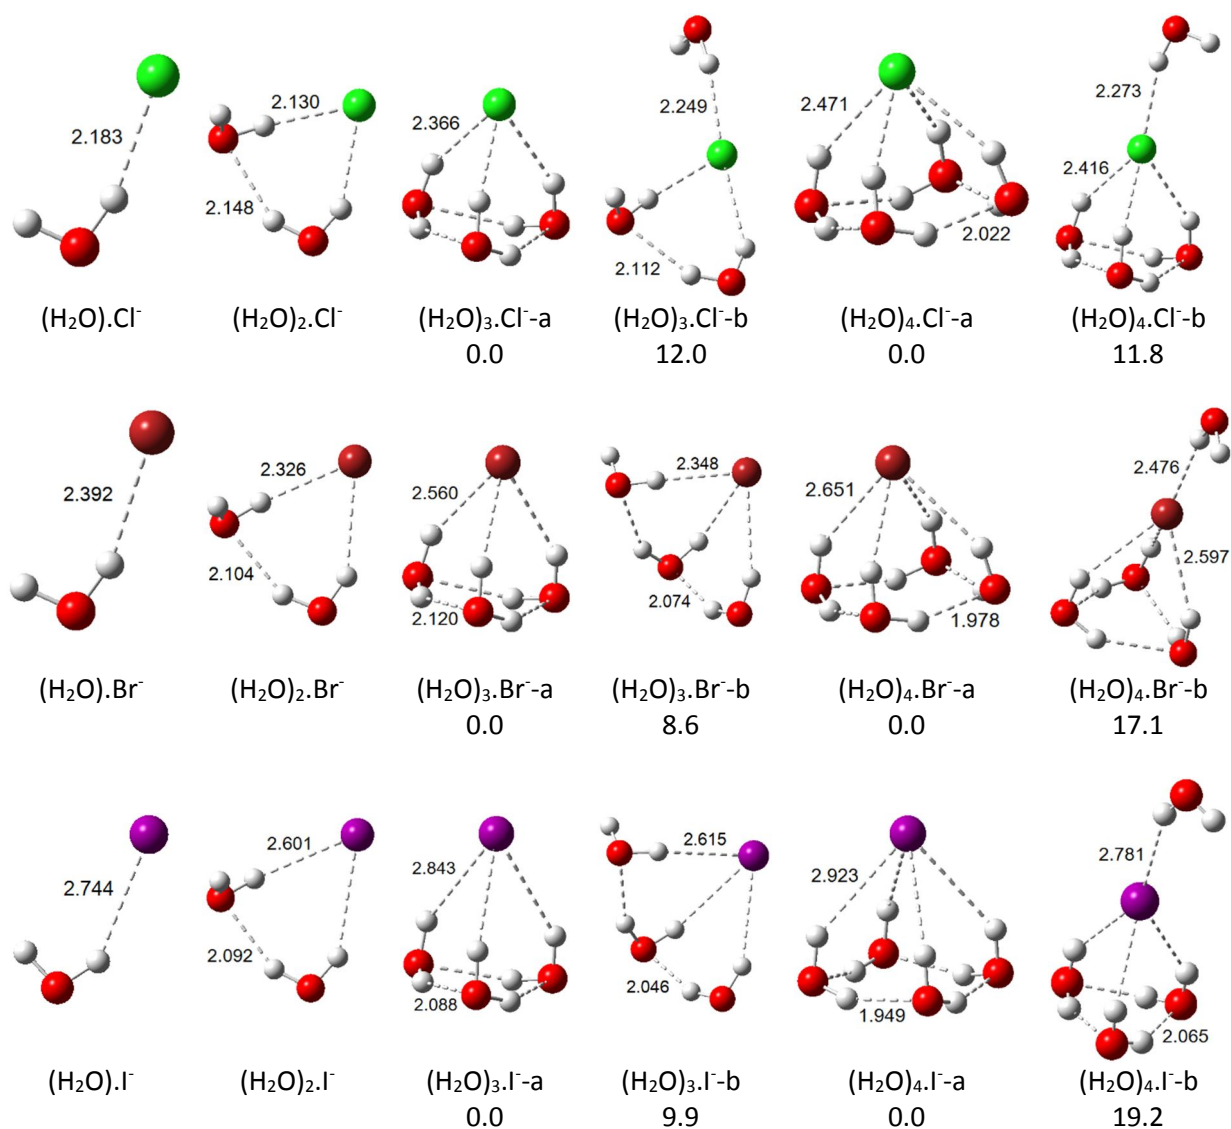

**Figure S11.** The optimized structures of hydrated forms of  $\text{Cl}^-$ ,  $\text{Br}^-$ , and  $\text{I}^-$  with up to 4 water molecules in gas phase. The relative energies and hydrogen bond lengths are in kJ mol<sup>-1</sup> and Å, respectively.

**Table S5.** The calculated values of  $\Delta H$ ,  $\Delta G$  and equilibrium constant ( $K$ ) for hydration of  $\text{Cl}^-$ ,  $\text{Br}^-$ , and  $\text{I}^-$  in gas phase and at 298 K.

| Hydration                                                                                              | $\Delta H$ (kJ mol <sup>-1</sup> ) | $\Delta G$ (kJ mol <sup>-1</sup> ) | $K$ (1/atm)       |
|--------------------------------------------------------------------------------------------------------|------------------------------------|------------------------------------|-------------------|
| $\text{Cl}^- + \text{H}_2\text{O} \rightarrow (\text{H}_2\text{O})\text{Cl}^-$                         | -60.6 (61.5) <sup>a</sup>          | -36.7 (-36.9) <sup>a</sup>         | $2.7 \times 10^6$ |
| $(\text{H}_2\text{O})\text{Cl}^- + \text{H}_2\text{O} \rightarrow (\text{H}_2\text{O})_2\text{Cl}^-$   | -53.1                              | -17.4                              | $1.1 \times 10^3$ |
| $(\text{H}_2\text{O})_2\text{Cl}^- + \text{H}_2\text{O} \rightarrow (\text{H}_2\text{O})_3\text{Cl}^-$ | -52.4                              | -9.6                               | $4.8 \times 10^1$ |
| $(\text{H}_2\text{O})_3\text{Cl}^- + \text{H}_2\text{O} \rightarrow (\text{H}_2\text{O})_4\text{Cl}^-$ | -49.2                              | -9.2                               | $4.1 \times 10^1$ |
| $\text{Br}^- + \text{H}_2\text{O} \rightarrow (\text{H}_2\text{O})\text{Br}^-$                         | -51.8 (49.0) <sup>a</sup>          | -28.7 (-30.6)                      | $1.1 \times 10^5$ |
| $(\text{H}_2\text{O})\text{Br}^- + \text{H}_2\text{O} \rightarrow (\text{H}_2\text{O})_2\text{Br}^-$   | -48.1                              | -12.5                              | $1.6 \times 10^2$ |
| $(\text{H}_2\text{O})_2\text{Br}^- + \text{H}_2\text{O} \rightarrow (\text{H}_2\text{O})_3\text{Br}^-$ | -50.1                              | -7.2                               | $1.8 \times 10^1$ |
| $(\text{H}_2\text{O})_3\text{Br}^- + \text{H}_2\text{O} \rightarrow (\text{H}_2\text{O})_4\text{Br}^-$ | -47.2                              | -4.5                               | $6.2 \times 10^0$ |
| $\text{I}^- + \text{H}_2\text{O} \rightarrow (\text{H}_2\text{O})\text{I}^-$                           | -43.1 <sup>a</sup>                 | -23.8 <sup>a</sup>                 | $1.5 \times 10^4$ |
| $(\text{H}_2\text{O})\text{I}^- + \text{H}_2\text{O} \rightarrow (\text{H}_2\text{O})_2\text{I}^-$     | -39.7 <sup>a</sup>                 | -17.8 <sup>a</sup>                 | $1.3 \times 10^3$ |
| $(\text{H}_2\text{O})_2\text{I}^- + \text{H}_2\text{O} \rightarrow (\text{H}_2\text{O})_3\text{I}^-$   | -38.5 <sup>a</sup>                 | -3.1 <sup>a</sup>                  | $3.5 \times 10^0$ |
| $(\text{H}_2\text{O})_3\text{I}^- + \text{H}_2\text{O} \rightarrow (\text{H}_2\text{O})_4\text{I}^-$   | -38.5 <sup>a</sup>                 | -2.2 <sup>a</sup>                  | $2.4 \times 10^0$ |

<sup>a</sup> From: Hiraoka, K.; Mizuse, S.; Yamabe, S., Solvation of Halide Ions with  $\text{H}_2\text{O}$  and  $\text{CH}_3\text{CN}$  in the Gas Phase, *J. Phys. Chem.*, **1988**, 92, 13, 3943.

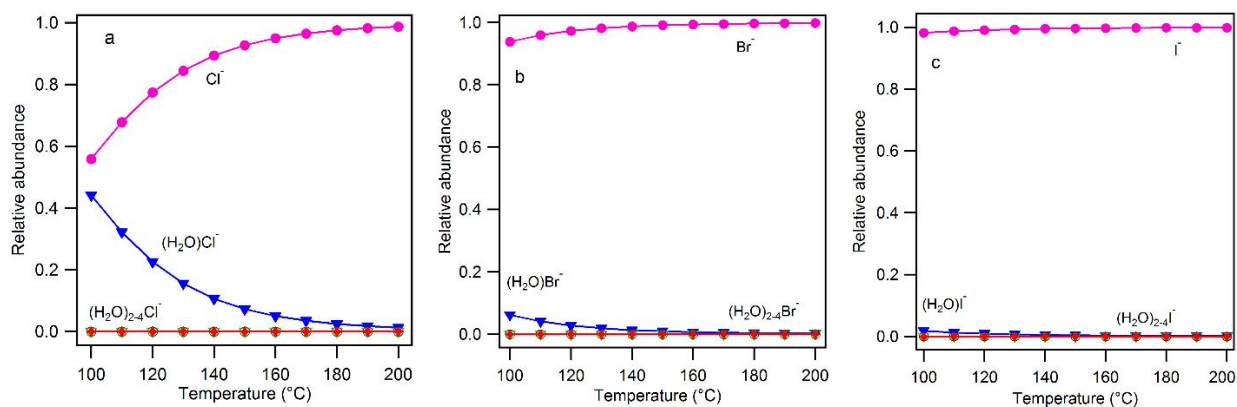

**Figure S12.** The calculated relative abundances for (a)  $(\text{H}_2\text{O})_n\text{Cl}^-$ , (b)  $(\text{H}_2\text{O})_n\text{Br}^-$ , and (c)  $(\text{H}_2\text{O})_n\text{I}^-$  in gas phase in the presence of 40 ppm water vapor.

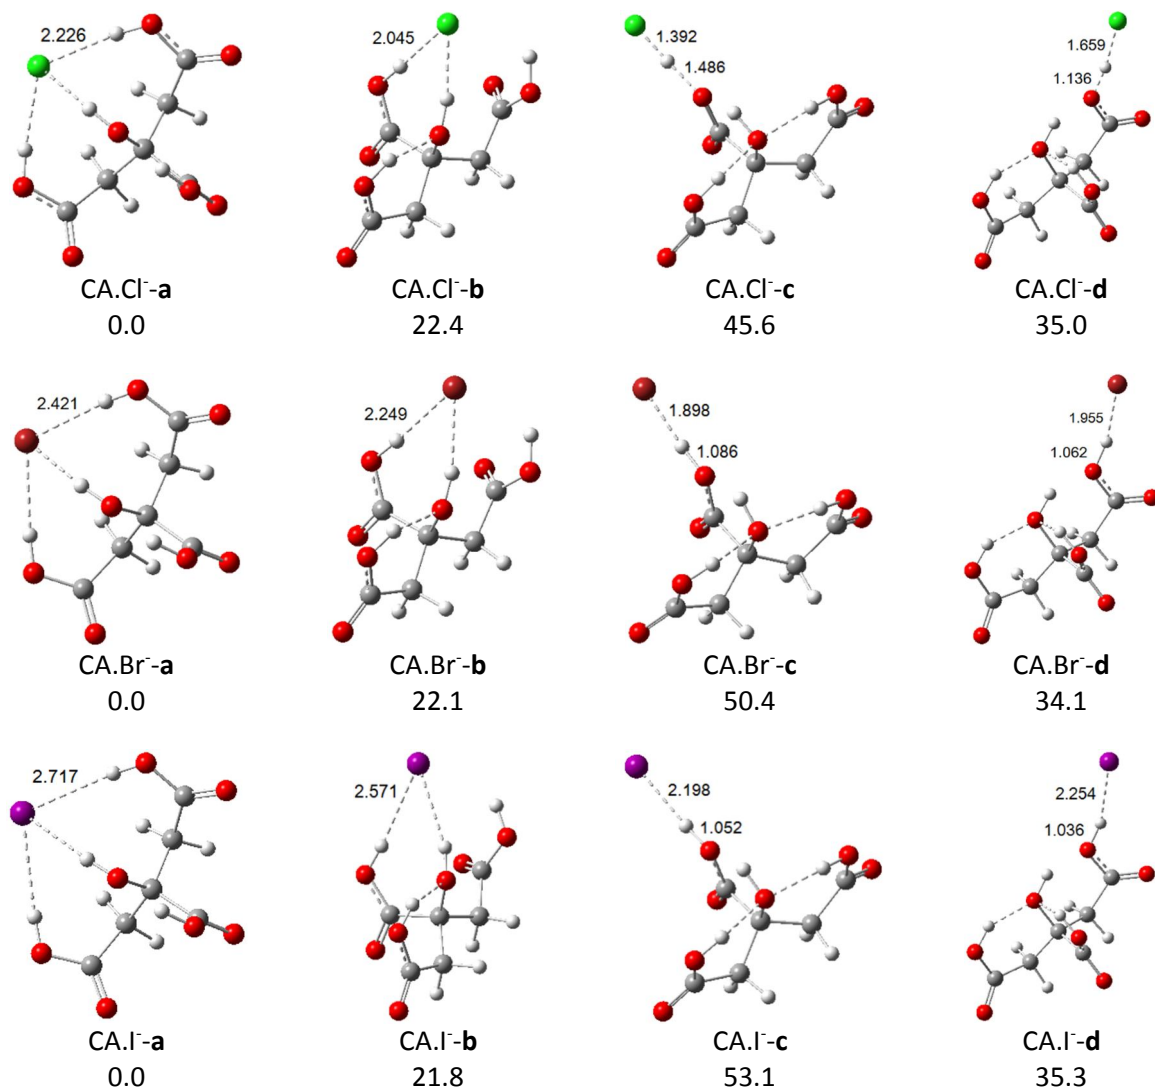

**Figure S13.** The optimized structures for different isomers of  $\text{CA.Cl}^-$ ,  $\text{CA.Br}^-$ , and  $\text{CA.I}^-$  in gas phase. The relative energies and bond lengths are in  $\text{kJ mol}^{-1}$  and  $\text{\AA}$ , respectively.

**Table S6.** The calculated values of  $\Delta H$  and  $\Delta G$  for formation of the most stable isomers of  $\text{CA.Cl}^-$ ,  $\text{CA.Br}^-$ , and  $\text{CA.I}^-$  in gas phase at 298 K.

| Halide attachment                                    | $\Delta H$ ( $\text{kJ mol}^{-1}$ ) | $\Delta G$ ( $\text{kJ mol}^{-1}$ ) |
|------------------------------------------------------|-------------------------------------|-------------------------------------|
| $\text{CA} + \text{Cl}^- \rightarrow \text{CA.Cl}^-$ | -150.4                              | -110.7                              |
| $\text{CA} + \text{Br}^- \rightarrow \text{CA.Br}^-$ | -143.6                              | -104.0                              |
| $\text{CA} + \text{I}^- \rightarrow \text{CA.I}^-$   | -148.6                              | -111.4                              |

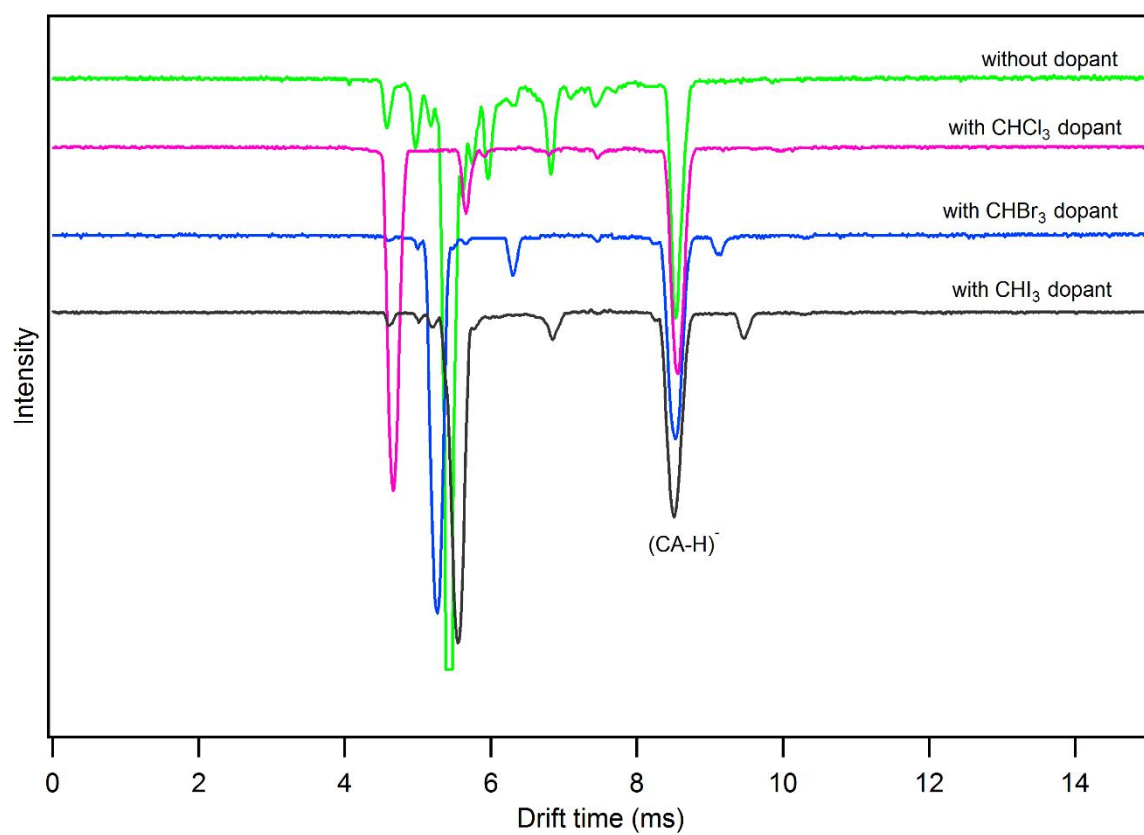

**Figure S14.** Comparison of IMS spectra of citric acid in negative mode with and without halomethane dopants ( $\text{CHCl}_3$ ,  $\text{CHBr}_3$ ,  $\text{CHI}_3$ ) at drift tube temperature of 200 °C.



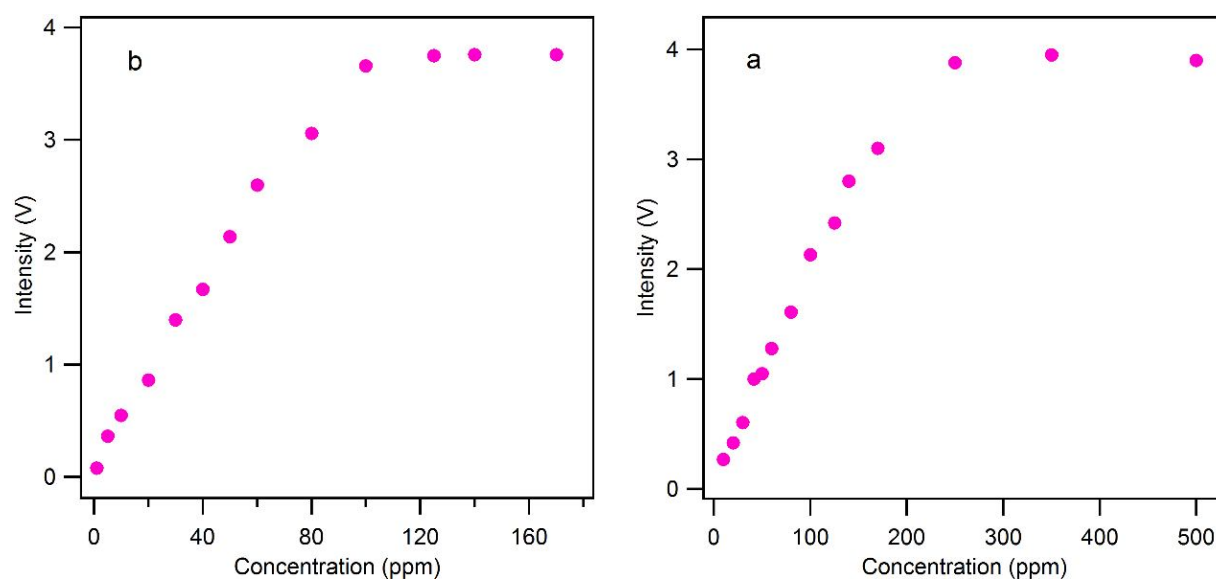

**Figure S15.** Calibration curves for citric acid obtained (a) in positive mode of IMS with  $\text{NH}_3$  dopant and (b) in negative mode of IMS with  $\text{CHCl}_3$  dopant.

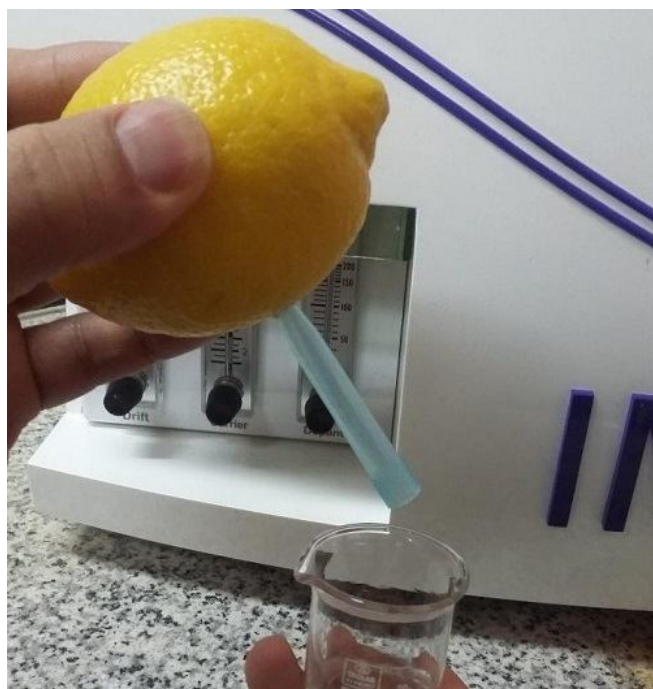

**Figure S16.** Manual preparation of fresh lemon juice for direct injection into IMS.
